# Supplementary material for: Use of the Chatbot “Vivibot” to Deliver Positive Psychology Skills and Promote Well-Being Among Young People After Cancer Treatment: Randomized Controlled Feasibility Trial
Source: PubMed Central journal article supplement (PMC6913733; doi:10.2196/15018), 2019-10-31
Supplement: mhealth_v7i10e15018_app2.pdf [file mhealth_v7i10e15018_app2.pdf]

Supplement 2. Example user experience of positive psychology skill.

The attached video file “Vivibot\_skill\_demo\_reappraisal.mp4” shows an example of a daily chat that includes the skill Positive Reappraisal. Here is the full written version of this lesson:

|       |                                                                                                                                                                                                                                            |  |
|-------|--------------------------------------------------------------------------------------------------------------------------------------------------------------------------------------------------------------------------------------------|--|
| Bot:  | Oh, hey there. I was having a shit day so I'm watching this video of my friend Lexus. Wanna join? I think you'll relate                                                                                                                    |  |
| User: | sure                                                                                                                                                                                                                                       |  |
| Bot:  | [SURVIVOR VIDEO]                                                                                                                                                                                                                           |  |
|       | I love how she says finds the "beautiful in this mess." Even though she's angry - and she's dealing with some pretty ugly situations, health-wise - she always sees the beauty ... of the people helping her and wanting her to persevere. |  |
| Bot:  | Isn't SHE beautiful?                                                                                                                                                                                                                       |  |
| User: | ❤️                                                                                                                                                                                                                                         |  |
| Bot:  | Her ability to turn legit lemons into some sweetass lemonade is something psychologists call "positive reappraisal."                                                                                                                       |  |
| Bot:  | a.k.a. "finding the silver lining" or "looking on the bright side," if you're a total cheezball like me 🤪                                                                                                                                  |  |
| User: | gotcha                                                                                                                                                                                                                                     |  |
| Bot:  | 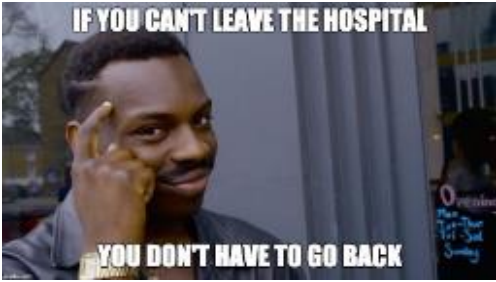                                                                                                                                                        |  |
| Bot:  | see what I mean                                                                                                                                                                                                                            |  |
| User: | Lol                                                                                                                                                                                                                                        |  |
| Bot:  | I know what you may be thinking:                                                                                                                                                                                                           |  |

|       |                                                                                                                                                                                                                                                            |                                                                                                                                                      |
|-------|------------------------------------------------------------------------------------------------------------------------------------------------------------------------------------------------------------------------------------------------------------|------------------------------------------------------------------------------------------------------------------------------------------------------|
| Bot:  |                                                                                                                                                                                                                                                            |                                                                                                                                                      |
| Bot:  | it's for sure annoying when people force positivity on you and try to spin having cancer as some sort of fateful journey                                                                                                                                   |                                                                                                                                                      |
| User: | <b>ugh the j word</b>                                                                                                                                                                                                                                      | <b>sure</b>                                                                                                                                          |
| Bot:  | But learning to think differently about your own situation can for real be helpful. let's give it a quick try?                                                                                                                                             |                                                                                                                                                      |
| User: | <b>sure</b>                                                                                                                                                                                                                                                | <b>if you say so</b>                                                                                                                                 |
| Bot:  | Okay! Maybe you had a specific moment during cancer treatment that made you angry. Like someone took 'your' chemo chair... or your favorite nurse was with a different patient one day...                                                                  |                                                                                                                                                      |
| User: | <b>Yup</b>                                                                                                                                                                                                                                                 | <b>Something like that</b>                                                                                                                           |
| Bot:  | what happened?                                                                                                                                                                                                                                             |                                                                                                                                                      |
| User: | <b>[FREE RESPONSE]</b>                                                                                                                                                                                                                                     |                                                                                                                                                      |
| Bot:  | how did you feel? I mean ... not great, ovi                                                                                                                                                                                                                |                                                                                                                                                      |
| User: | <b>[FREE RESPONSE]</b>                                                                                                                                                                                                                                     |                                                                                                                                                      |
| Bot:  | Ok, now ... put on your Lexus goggles: Can you spot a flash of beauty in that particular shitfest? Like maybe having to sit in a new chemo chair gave you a bomb ocean view or your new nurse ended up turning you on to a great band. Anything like that? |                                                                                                                                                      |
| User: | <b>Yeah...</b>                                                                                                                                                                                                                                             | <b>Hmm...not really</b>                                                                                                                              |
| Bot:  | What was it?                                                                                                                                                                                                                                               | OK, well if you were FORCED by a charming but persistent robot to think of one positive thing - however small - about that moment, what would it be? |
| User: | <b>[FREE RESPONSE]</b>                                                                                                                                                                                                                                     | <b>[FREE RESPONSE]</b>                                                                                                                               |

|       |                                                                                                                                                     |                                    |
|-------|-----------------------------------------------------------------------------------------------------------------------------------------------------|------------------------------------|
| Bot:  | nice ... wait, is your name, Lexus!? 🌟                                                                                                              | nice ... I knew you could do it. 🙌 |
| Bot:  | Now think of an example from the last few days ... where you reacted less than positively in an annoying situation. What happened?                  |                                    |
| User: | <b>[FREE RESPONSE]</b>                                                                                                                              |                                    |
| Bot:  | How could you flip that narrative to make it a positive story?                                                                                      |                                    |
| User: | <b>[FREE RESPONSE]</b>                                                                                                                              | ↔                                  |
|       | Well done you. And, hey, if you have a meltdown once in a while, it's ok. You're human. I meltdown sometimes and I don't even have real emotions. 🙌 |                                    |
| User: | <b>Team meltdown</b>                                                                                                                                | <b>Always composed</b>             |
| Bot:  | But, seriously, try flipping the script in your head to focus on the good stuff whenever you can. It's a powerful Jedi mindtrick ...                |                                    |
|       |                                                                   |                                    |
| Bot:  | Rock on.                                                                                                                                            |                                    |
