# Supplementary material for: Use of the Chatbot “Vivibot” to Deliver Positive Psychology Skills and Promote Well-Being Among Young People After Cancer Treatment: Randomized Controlled Feasibility Trial
Source: PubMed Central journal article supplement (PMC6913733; doi:10.2196/15018), 2019-10-31

### Supplement 3. Screen shot of daily mood ratings

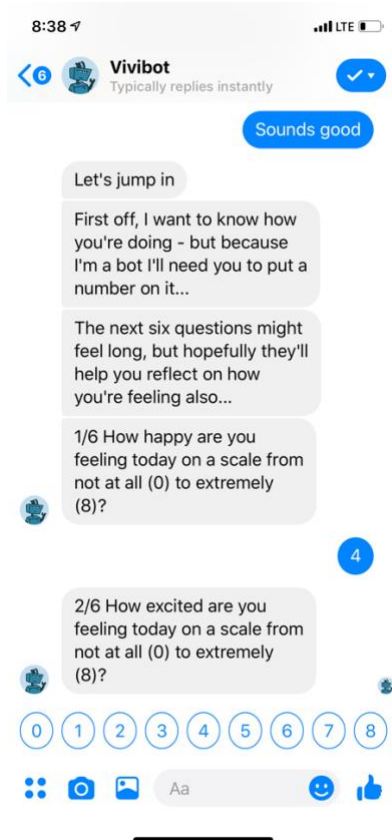

Supplement: mhealth_v7i10e15018_app3.pdf [file mhealth_v7i10e15018_app3.pdf]
