# Supplementary material for: Use of the Chatbot “Vivibot” to Deliver Positive Psychology Skills and Promote Well-Being Among Young People After Cancer Treatment: Randomized Controlled Feasibility Trial
Source: PubMed Central journal article supplement (PMC6913733; doi:10.2196/15018), 2019-10-31
Supplement: mhealth_v7i10e15018_app4.pdf [file mhealth_v7i10e15018_app4.pdf]

Supplement 4. Comparisons for all outcomes at 8 weeks

|                   | Condition    | Baseline<br>M (Stdev) | Week 4<br>M (Stdev) | Difference<br>from<br>baseline | Change<br>from<br>baseline | Week 8<br>M (Stdev) | Difference<br>from<br>baseline | Change<br>from<br>baseline | Difference<br>from week4 | Change<br>from<br>week4 |
|-------------------|--------------|-----------------------|---------------------|--------------------------------|----------------------------|---------------------|--------------------------------|----------------------------|--------------------------|-------------------------|
| <b>Anxiety</b>    | Experimental | 64.5 (6.1)            | 61.9 (7.7)          | -2.58                          | <b>p=0.03</b>              | 63.3 (6.2)          | -1.23                          | p=0.41                     | 1.34                     | p=0.59                  |
|                   | Control      | 62.6 (7.9)            | 63.3 (5.5)          | 0.7                            | p=0.70                     | 60.6 (9.6)          | -2.02                          | p=0.34                     | -2.72                    | <b>p=0.13</b>           |
| <b>Depression</b> | Experimental | 60.1 (7.4)            | 58.2 (8.8)          | -1.83                          | p=0.50                     | 57.3 (10.1)         | -2.76                          | p=0.31                     | -0.93                    | p=0.61                  |
|                   | Control      | 59.0 (9.2)            | 57.7 (6.1)          | -1.38                          | p=0.30                     | 58.0 (7.7)          | -1.09                          | p=0.65                     | 0.29                     | p=0.70                  |
| <b>Negative E</b> | Experimental | 1.8 (0.7)             | 1.5 (0.9)           | -0.31                          | <b>p=0.12</b>              | 1.4 (0.7)           | -0.43                          | <b>p=0.03</b>              | -0.12                    | p=0.29                  |
|                   | Control      | 1.9 (0.7)             | 1.6 (0.6)           | -0.23                          | <b>p=0.15</b>              | 1.6 (0.6)           | -0.27                          | p=0.22                     | -0.04                    | p=0.85                  |
| <b>Positive E</b> | Experimental | 2.4 (0.8)             | 2.5 (1.0)           | 0.04                           | p=0.91                     | 2.5 (0.8)           | 0.05                           | p=0.87                     | 0.01                     | p=0.89                  |
|                   | Control      | 2.3 (0.9)             | 2.3 (0.8)           | -0.08                          | p=0.82                     | 2.4 (0.8)           | 0.09                           | p=0.70                     | 0.16                     | p=0.53                  |
