# Supplementary material for: Use of the Chatbot “Vivibot” to Deliver Positive Psychology Skills and Promote Well-Being Among Young People After Cancer Treatment: Randomized Controlled Feasibility Trial
Source: PubMed Central journal article supplement (PMC6913733; doi:10.2196/15018), 2019-10-31
Supplement: mhealth_v7i10e15018_app6.pdf [file mhealth_v7i10e15018_app6.pdf]

Supplement 6. Converted scores on the PROMIS-Anxiety and PROMIS-Depression scales

To facilitate comparison of results to previous reports, PROMIS scores for each individual were converted to PHQ9 and GAD7 scores using previously published conversion tables.

|                                    | <b>Condition</b> | <b>Baseline<br/>M (Stdev)</b> | <b>Week 4<br/>M (Stdev)</b> | <b>Difference of<br/>the means</b> |
|------------------------------------|------------------|-------------------------------|-----------------------------|------------------------------------|
| <b>Anxiety (GAD7 Converted)</b>    | Experimental     | 11.6 (4.2)                    | 9.8 (4.7)                   | -1.82                              |
| <b>Anxiety (GAD7 Converted)</b>    | Control          | 10.5 (5.0)                    | 10.9 (3.6)                  | 0.38                               |
| <b>Depression (PHQ9 Converted)</b> | Experimental     | 10.8 (5.2)                    | 9.5 (6.2)                   | -1.31                              |
| <b>Depression (PHQ9 Converted)</b> | Control          | 10.3 (6.2)                    | 8.8 (3.8)                   | -1.48                              |

GAD7 table: <https://www.ncbi.nlm.nih.gov/pmc/articles/PMC4046852/pdf/nihms564318.pdf>

PHQ9 conversion table: <https://www.ncbi.nlm.nih.gov/pmc/articles/PMC5515387/>
